# Supplementary material for: High-color-quality white electroluminescence and amplified spontaneous emission from a star-shaped single-polymer system with simultaneous three-color emission
Source: Royal Society of Chemistry journal article supplement (doi:10.1039/c6py01643j), 2016-12-26
Supplement: c6py01643j1.pdf [file c6py01643j1.pdf]

**Supplementary Information for**

**High-Color-Quality White Electroluminescence and Amplified  
Spontaneous Emission from a Star-Shaped Single-Polymer System with  
Simultaneous Three-Color Emission**

Yuanda Jiu,<sup>a</sup> Jianyun Wang,<sup>a</sup> Jianpeng Yi,<sup>a</sup> Cheng-Fang Liu,<sup>a</sup> Xin-Wen Zhang,<sup>a</sup> Wen-Yong Lai<sup>\*ab</sup> and  
Wei Huang<sup>ab</sup>

<sup>a</sup>Key Laboratory for Organic Electronics and Information Displays (KLOEID) & Institute of  
Advanced Materials (IAM), Jiangsu National Synergetic Innovation Center for Advanced Materials  
(SICAM), Nanjing University of Posts & Telecommunications, 9 Wenyuan Road, Nanjing 210023,  
China

<sup>b</sup>Key Laboratory of Flexible Electronics (KLOFE) & Institute of Advanced Materials (IAM), Jiangsu  
National Synergetic Innovation Center for Advanced Materials (SICAM), Nanjing Tech University  
(NanjingTech), 30 South Puzhu Road, Nanjing 211816, China

*\*Email: iamwylai@njupt.edu.cn*

## Experimental

### 4,7-dibromobenzo[c][1,2,5]thiadiazole (**2**)

White solid, yield 86%.  $^1\text{H}$  NMR ( $\text{CDCl}_3$ , 400 MHz)  $\delta$  (ppm): 7.72 (s, 2H).  $^{13}\text{C}$  NMR ( $\text{CDCl}_3$ )  $\delta$  (ppm): 152.95, 132.34, 113.91.

### 2,2'-(9,9-dihexyl-9H-fluorene-2,7-diyl)bis(4,4,5,5-tetramethyl-1,3,2-dioxaborolane) (**4**)

White solid, yield 91%.  $^1\text{H}$  NMR ( $\text{CDCl}_3$ , 400 MHz)  $\delta$  (ppm): 7.80-7.82 (d, 2H,  $J = 8.1$  Hz), 7.71-7.75 (m, 4H), 1.98-2.02 (m, 4H), 1.39 (s, 24H), 0.99-1.10 (m, 12H), 0.73-0.76 (t, 6H,  $J = 7.1$  Hz), 0.50-0.56 (dd, 4H,  $J = 7.3$  Hz,  $J = 15.5$  Hz).  $^{13}\text{C}$  NMR ( $\text{CDCl}_3$ )  $\delta$  (ppm): 150.47, 143.93, 133.66, 128.92, 119.38, 83.72, 55.19, 40.10, 31.45, 29.63, 24.95, 23.57, 22.58, 14.02.

### 4,7-bis(4-hexylthiophen-2-yl)benzo[c][1,2,5]thiadiazole (**7**)

Pale-yellow solid, yield 81%.  $^1\text{H}$  NMR ( $\text{CDCl}_3$ , 400 MHz)  $\delta$  (ppm): 7.98 (s, 2H), 7.83(s, 2H), 7.04(s, 2H), 2.68-2.71 (t, 4H), 1.67-1.72 (m, 4H), 1.34 (m, 12H), 0.89-0.92 (t, 6H).  $^{13}\text{C}$  NMR ( $\text{CDCl}_3$ )  $\delta$  (ppm): 154.31, 141.72, 132.22, 129.93, 129.25, 127.49, 125.90, 31.60, 30.72, 29.39, 29.14, 22.57, 14.08.

### 4-(5-bromo-4-hexylthiophen-2-yl)-7-(4-hexylthiophen-2-yl)benzo[c][1,2,5]thiadiazole (**8**)

Red solid, yield 83%.  $^1\text{H}$  NMR ( $\text{CDCl}_3$ , 400 MHz)  $\delta$  (ppm): 7.97 (s, 1H), 7.70-7.78 (m, 3H), 7.04 (s, 3H), 2.61-2.71 (m, 4H), 1.65-1.72 (m, 4H), 1.34-1.41 (m, 12H), 0.91 (t, 6H).  $^{13}\text{C}$  NMR ( $\text{CDCl}_3$ )  $\delta$  (ppm): 152.48, 152.31, 144.42, 142.99, 138.86, 138.66, 129.18, 127.86, 126.31, 125.33, 124.94, 121.72, 111.36, 31.73, 31.67, 30.67, 30.49, 29.77, 29.72, 29.71, 29.08, 29.00, 22.66, 22.65, 14.14.

### 3,6-bis(4,4,5,5-tetramethyl-1,3,2-dioxaborolan-2-yl)-9-(4-(4,4,5,5-tetramethyl-1,3,2-dioxaborolan-2-yl)phenyl)-9H-carbazole (**12**)

White solid, yield 66%.  $^1\text{H}$  NMR ( $\text{CDCl}_3$ , 400 MHz)  $\delta$  (ppm): 8.70 (s, 2H), 8.05-8.07 (d, 2H,  $J =$

8.4 Hz), 7.83-7.85 (t, 2H,  $J = 7.0$  Hz), 7.56-7.58 (d, 2H,  $J = 8.2$  Hz), 7.37-7.40(m, 2H) , 1.39 (s, 36H).

$^{13}\text{C}$  NMR ( $\text{CDCl}_3$ )  $\delta$  (ppm): 142.87, 142.86, 139.99, 136.42, 132.36, 128.02, 126.14, 123.39, 109.21, 84.10, 83.61, 24.95.

Tris(4-(4,4,5,5-tetramethyl-1,3,2-dioxaborolan-2-yl)phenyl)amine (**15**)

White solid, yield 63%.  $^1\text{H}$  NMR ( $\text{CDCl}_3$ , 400 MHz),  $\delta$  (ppm): 7.68-7.70 (d, 6H), 7.07-7.09 (d, 6H), 1.34 (s, 36H).  $^{13}\text{C}$  NMR ( $\text{CDCl}_3$ ),  $\delta$  (ppm): 149.80, 135.93, 123.49, 83.68, 24.89.

7,7'-(5,5'-(9-(4-(3-hexyl-5-(7-(4-hexylthiophen-2-yl)benzo[c][1,2,5]thiadiazol-4-yl)thiophen-2-yl)phenyl)-9H-carbazole-3,6-diyl)bis(4-hexylthiophene-5,2-diyl))bis(4-(4-hexylthiophen-2-yl)benzo[c][1,2,5]thiadiazole) (**TM**)

Dark red solid, yield 76%.  $^1\text{H}$  NMR ( $\text{CDCl}_3$ , 400 MHz)  $\delta$  (ppm): 8.32 (s, 2H), 8.05-8.07 (d, 3H,  $J = 11.0$  Hz), 7.96-7.97 (d, 3H,  $J = 5.0$  Hz), 7.74-7.82 (m, 8H), 7.60-7.66 (dd, 4H,  $J = 8.5$  Hz,  $J = 16.2$  Hz) , 7.53-7.55 (d, 2H,  $J = 8.5$  Hz), 7.03 (m, 3H), 2.81-2.85 (m, 6H), 2.67-2.71 (t, 6H,  $J = 7.5$  Hz), 1.69-1.80 (m, 12H), 1.29-1.43 (m, 36H), 0.86-0.92 (m, 18H).  $^{13}\text{C}$  NMR ( $\text{CDCl}_3$ )  $\delta$  (ppm): 152.64, 152.60, 144.38, 144.32, 140.50, 140.49, 140.40, 140.29, 139.46, 139.13, 138.23, 137.82, 136.89, 136.51, 133.92, 130.59, 130.31, 130.30, 129.07, 128.88, 127.86, 126.83, 126.80, 125.87, 125.66, 125.54, 125.42, 124.99, 123.69, 121.60, 121.41, 121.27, 121.26, 110.09, 110.06, 110.03, 31.76, 30.71, 30.50, 29.40, 29.13, 22.72, 22.70, 14.18, 14.15. MS (MALDI-TOF,  $m/z$ ):  $[\text{M}]^+$  Calcd. For  $\text{C}_{96}\text{H}_{103}\text{N}_7\text{S}_9$ : 1643.5; found: 1645.9 ( $[\text{M}+2\text{H}]^+$ ) Anal. Calcd. for  $\text{C}_{96}\text{H}_{103}\text{N}_7\text{S}_9$ : C 70.16, H 6.32, N 5.97, S 17.56; Found: C 70.12, H 6.49, N 6.19, S 17.68.

**Table S1.** Thermal, electrochemical and photophysical properties of TM.

| Sample | $T_g$ [°C] | $T_d$ [°C] | $E_{\text{HOMO}}$ [eV] | $E_{\text{LUMO}}$ [eV] | $E_g$ [eV] | $\lambda_{\text{abs}}$ [nm] | $\lambda_{\text{em}}$ [nm] |
|--------|------------|------------|------------------------|------------------------|------------|-----------------------------|----------------------------|
| TM     | 159        | 407        | -5.65                  | -2.87                  | 2.78       | 334/486                     | 625                        |

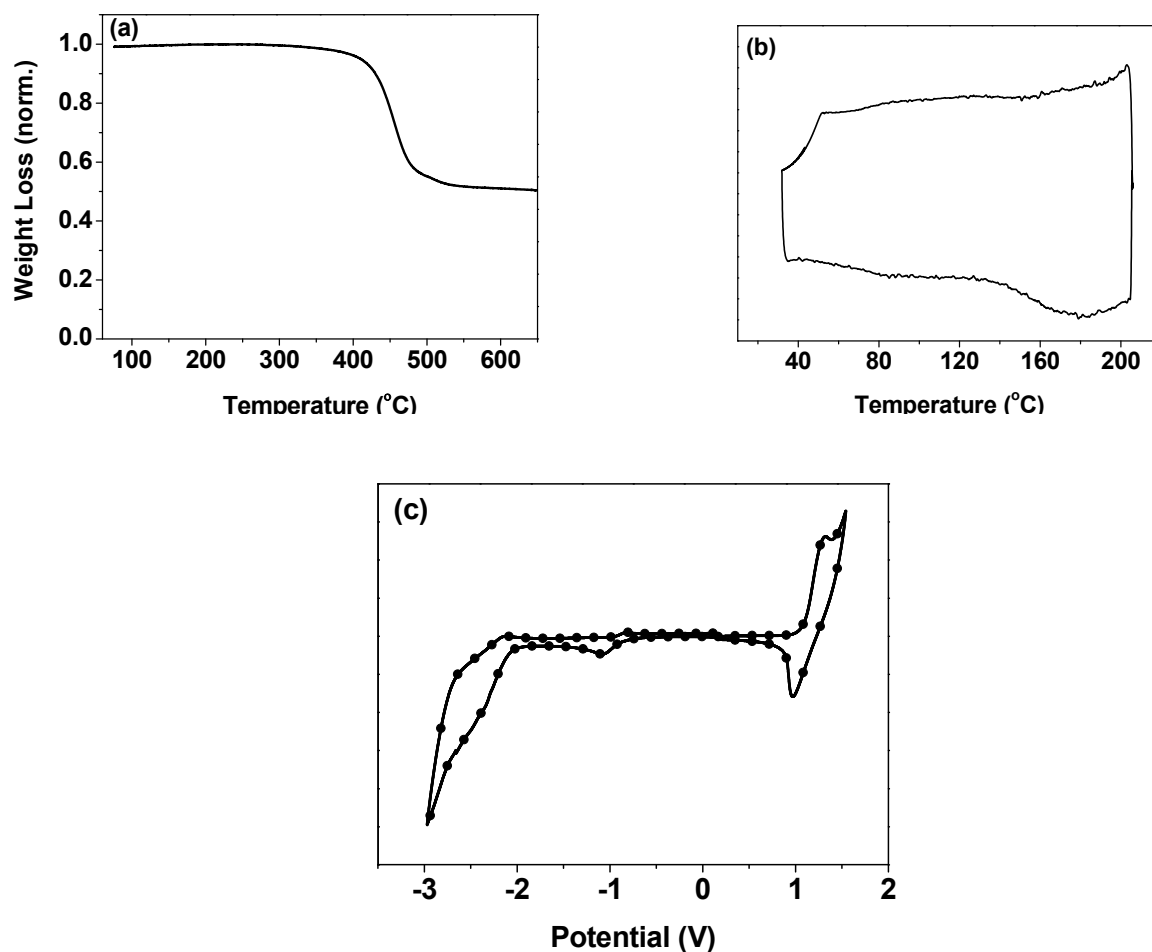

**Figure S1.** (a, b) Thermal properties and (c) electrochemical properties of TM.

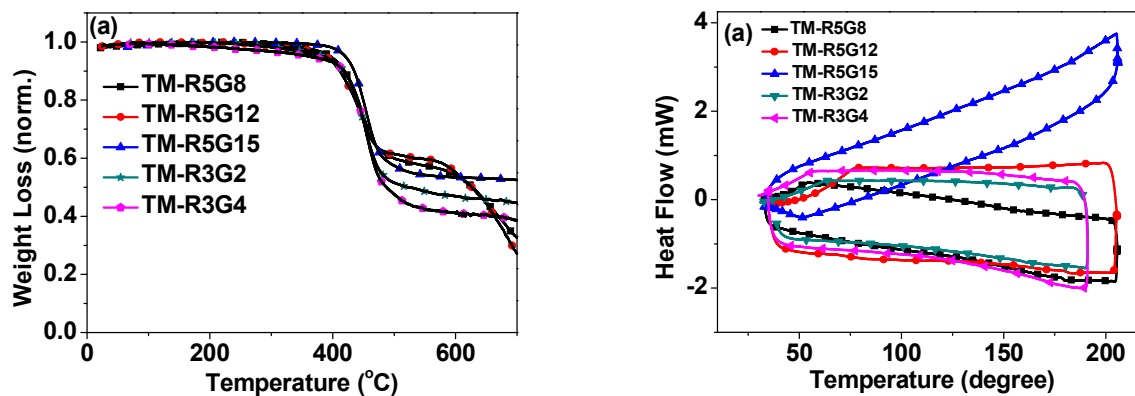

**Figure S2.** Thermal properties of TM-RxGy: (a) TGA and (b) DSC curves.

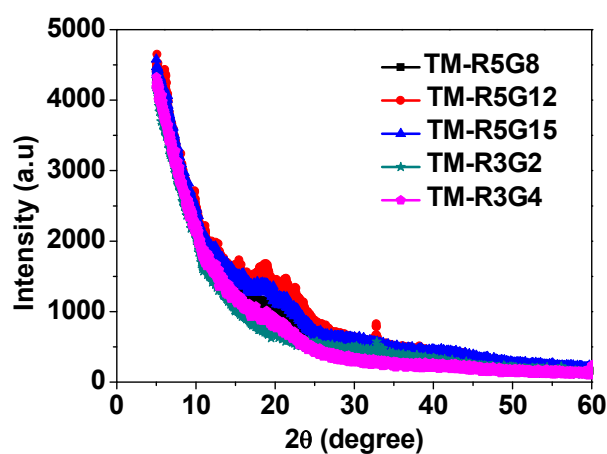

**Figure S3.** WAXD patterns (0-60°) of TM-RxGy powders. All samples were tested under the same conditions and each pattern was at its original intensity.

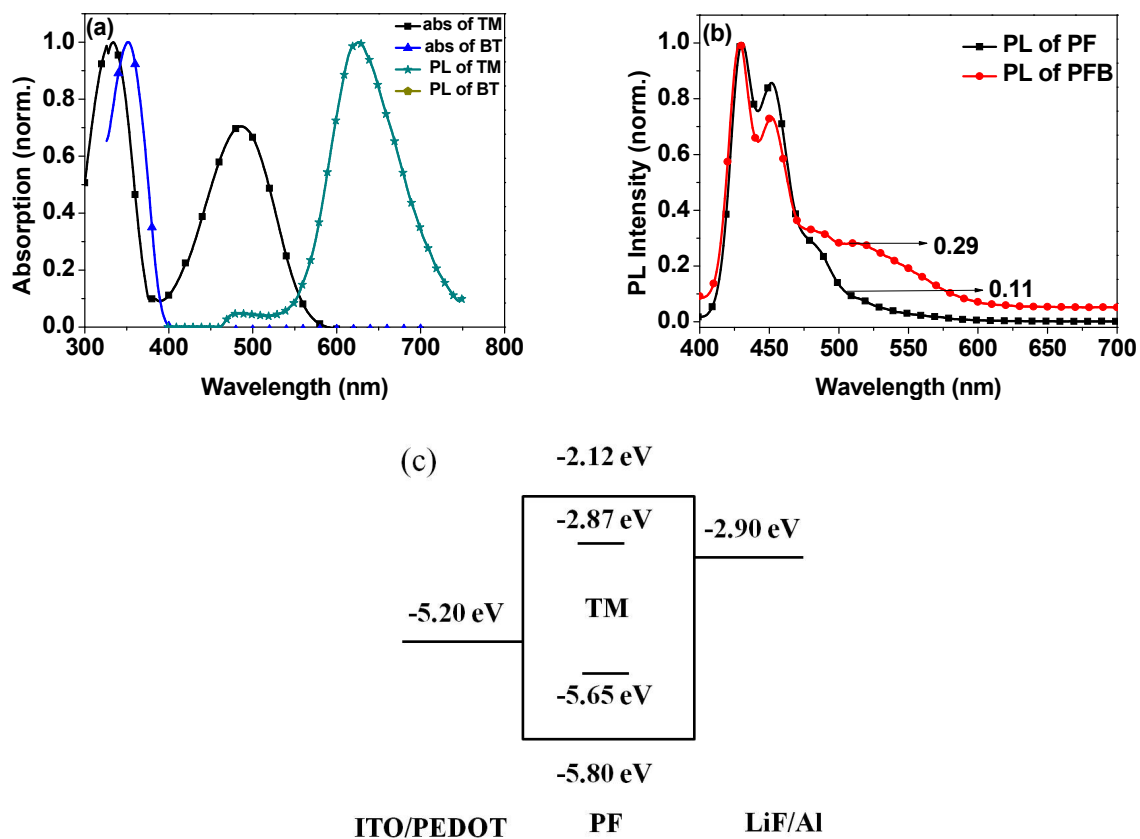

**Figure S4.** (a) Absorption spectra and PL spectra of TM and BT in dilute solutions; (b) PL spectra of PF and PFB in solid films; (c) Energy levels of TM and PF.

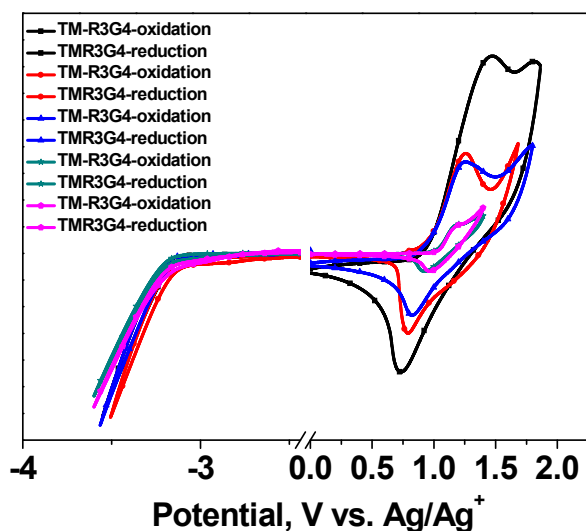

**Figure S5.** Electrochemical properties of TM-RxGy.

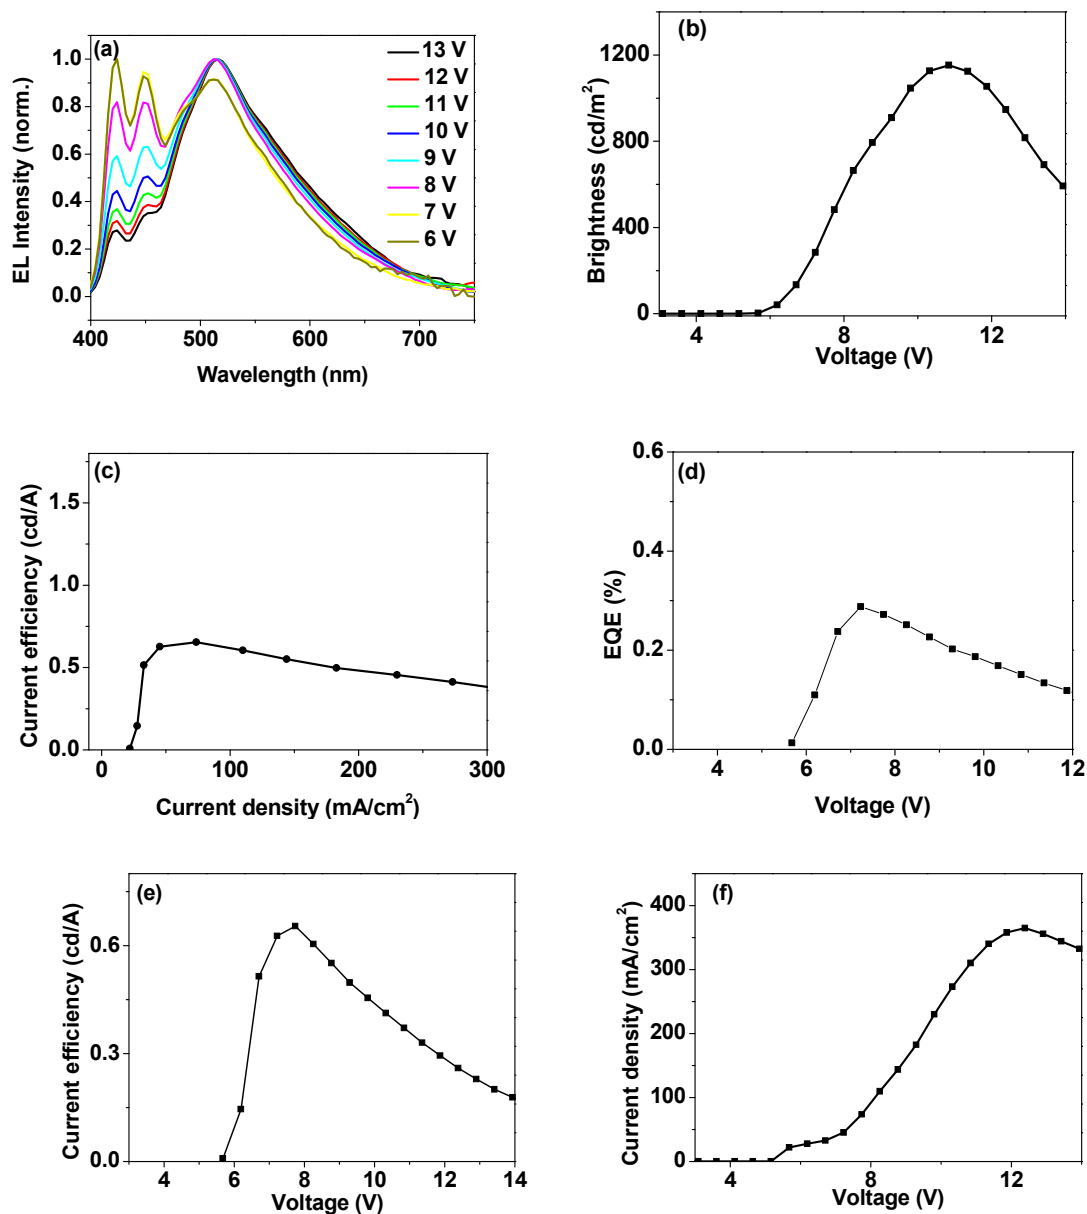

**Figure S6.** EL characteristics of devices based on 0.03 mol% TM blended into PFB. (a) EL spectra with different voltages; (b) Brightness-voltage characteristics; (c) Current efficiency-current density characteristics; (d) EQE-voltage characteristics; (e) Current efficiency-voltage characteristics; (f) Current density-voltage characteristics.

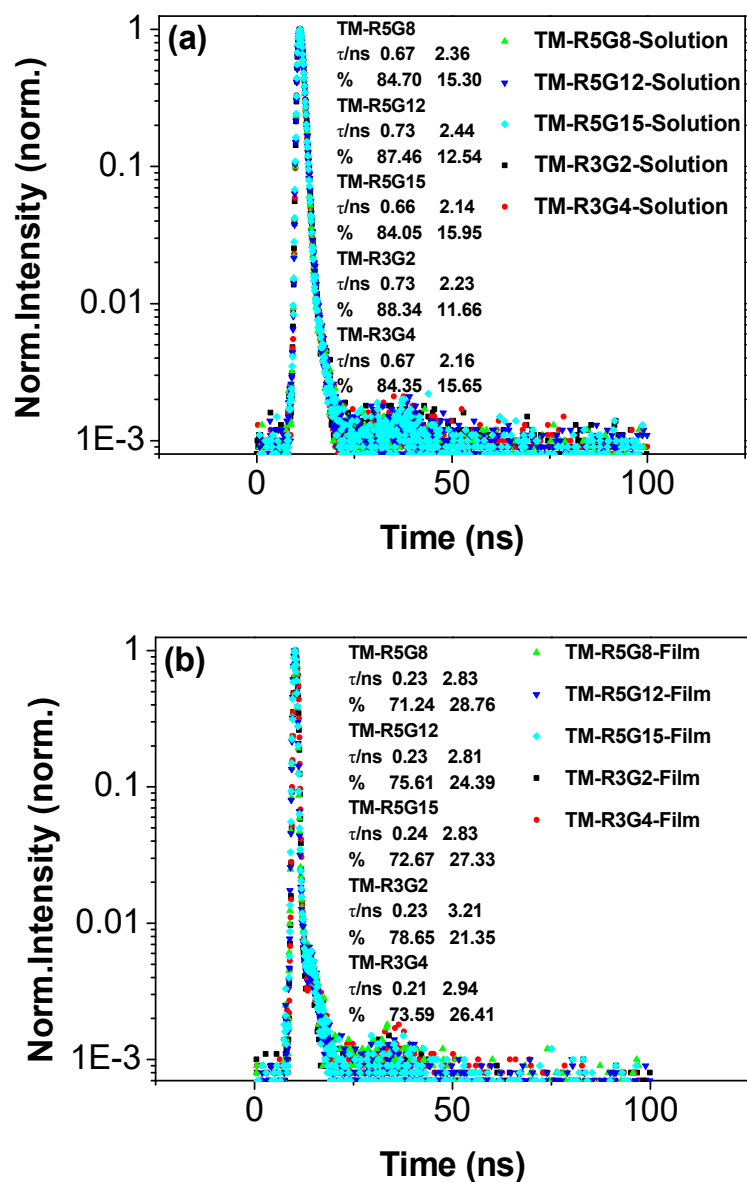

**Figure S7.** Fluorescence transients of (a) THF solution ( $10^{-5}$  M) and (b) films of TM-RxGy measured at the fluorescence band maxima collected at 421 nm and 434 nm, respectively.



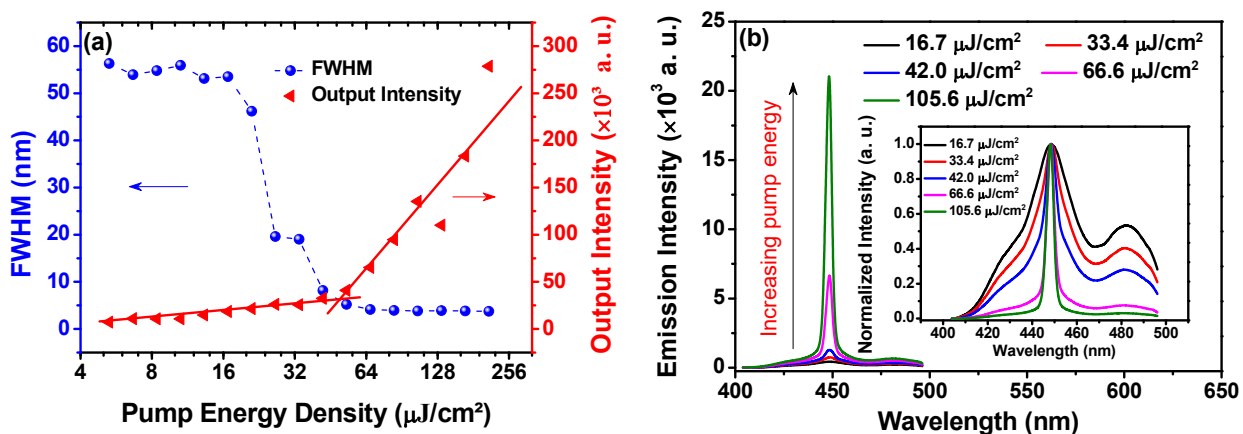

**Figure S8.** ASE characteristics of PF. (a) The FWHM of the emission spectrum (left, solid spheres) and the corresponding light emission peak intensity (right, solid triangles); (b) The emission spectra for the planar waveguide of PF under laser pumped by different energy, and the corresponding normalized spectra shown in the inset.

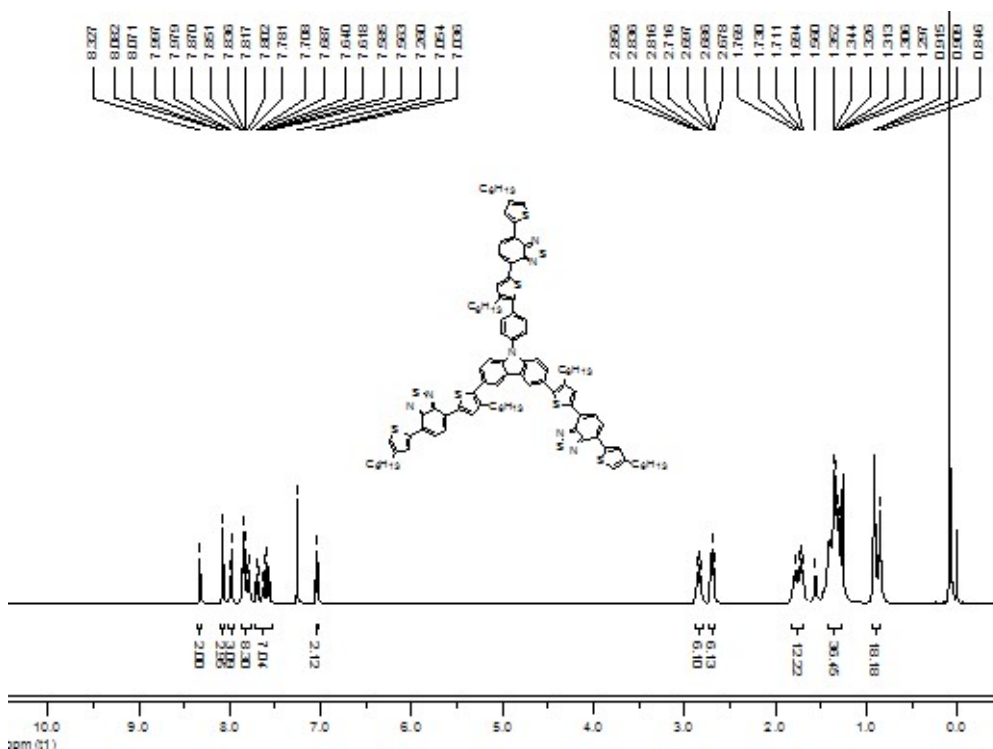

**Figure S9.**  $^1\text{H}$  NMR spectrum of TM in  $\text{CDCl}_3$ .

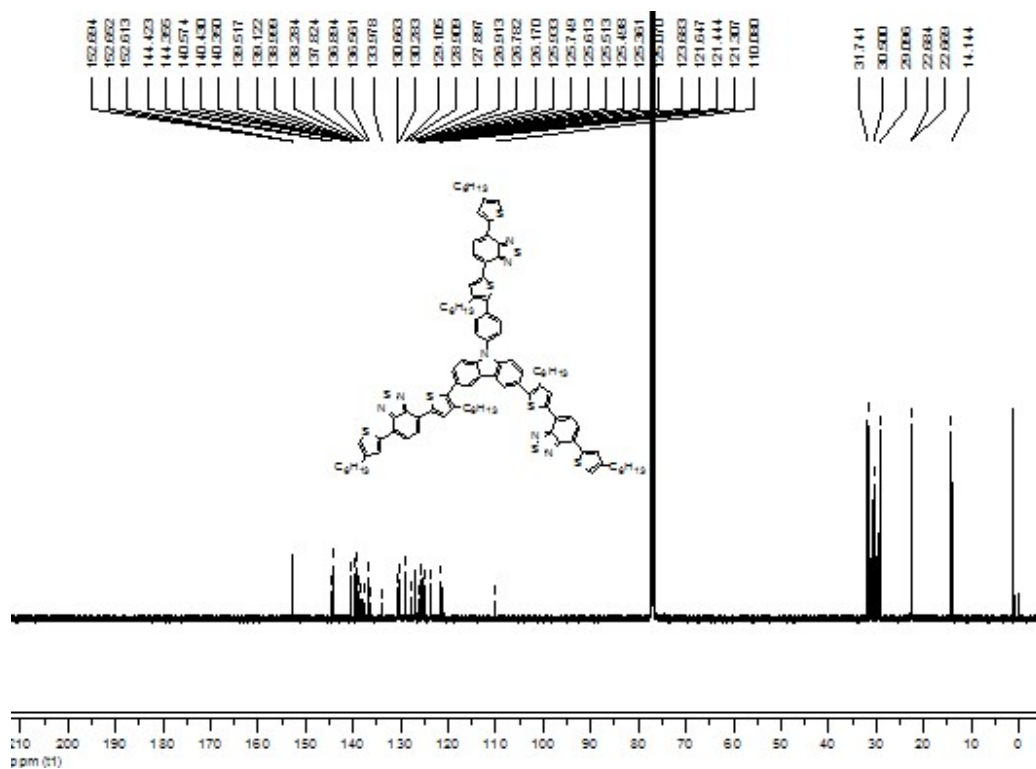

Figure S10.  $^{13}\text{C}$  NMR spectrum of TM in  $\text{CDCl}_3$ .

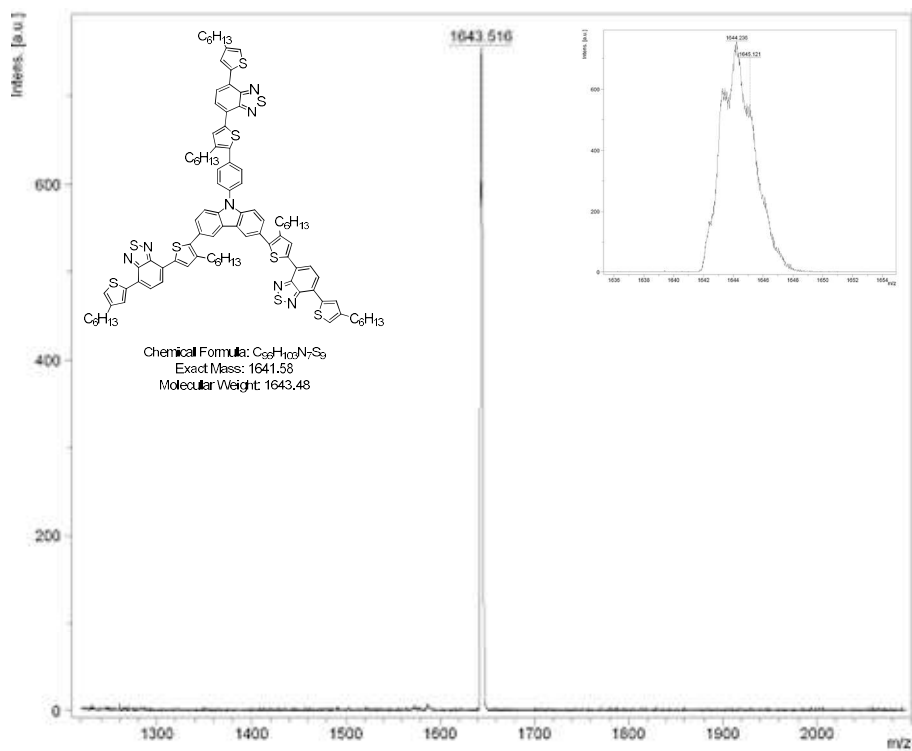

Figure S11. MALDI-TOF mass spectrum of TM.

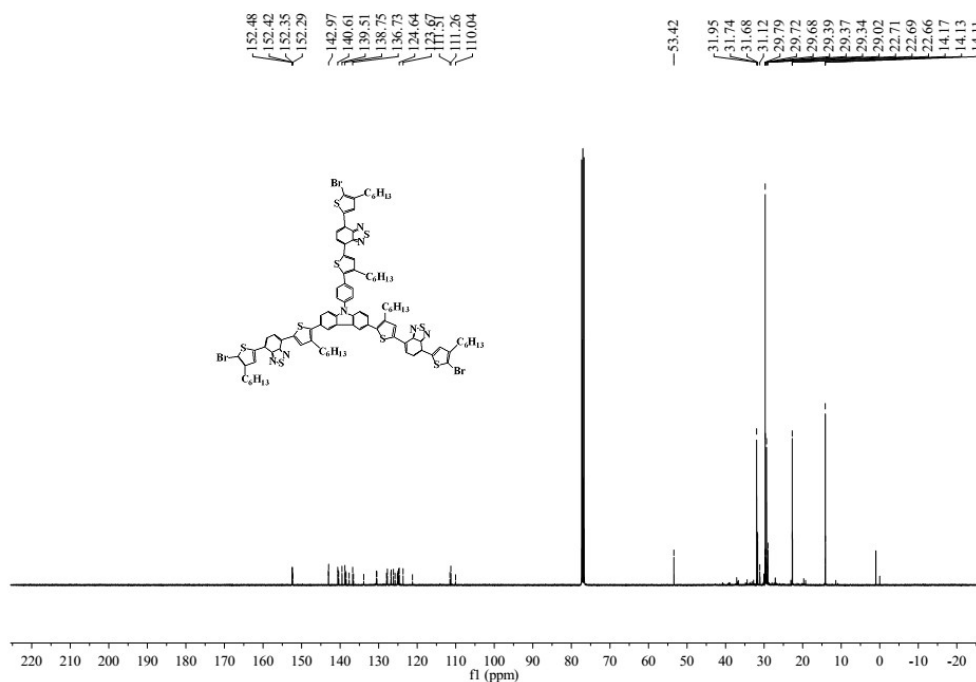

Figure S12. <sup>1</sup>H NMR spectrum of TM3Br in CDCl<sub>3</sub>.

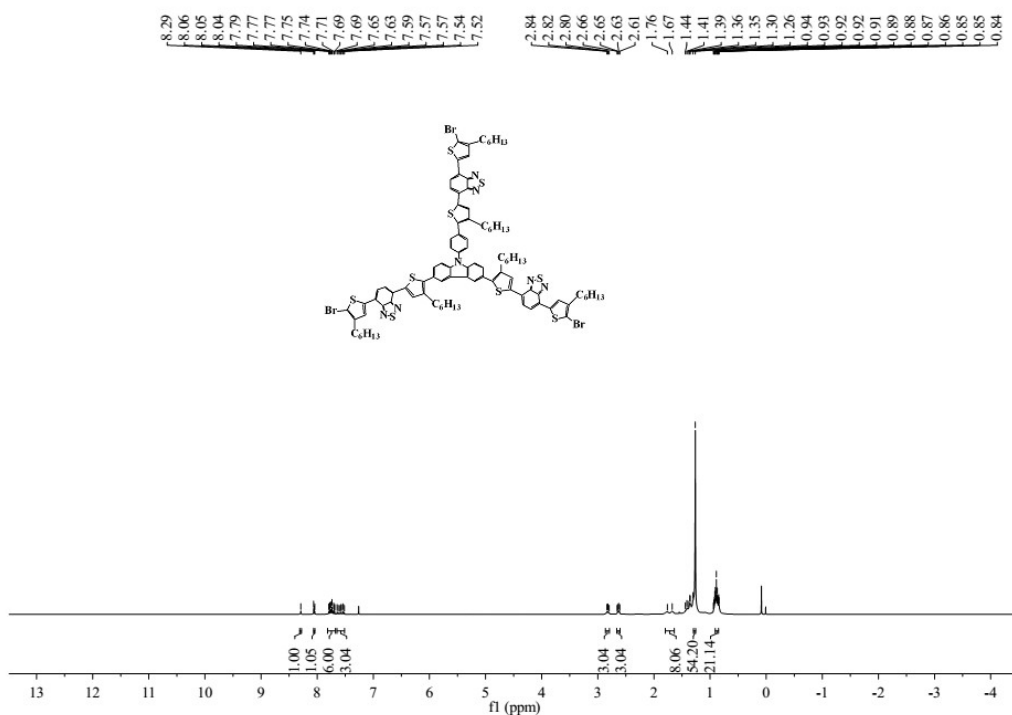

Figure S13. <sup>13</sup>C NMR spectrum of TM3Br in CDCl<sub>3</sub>.

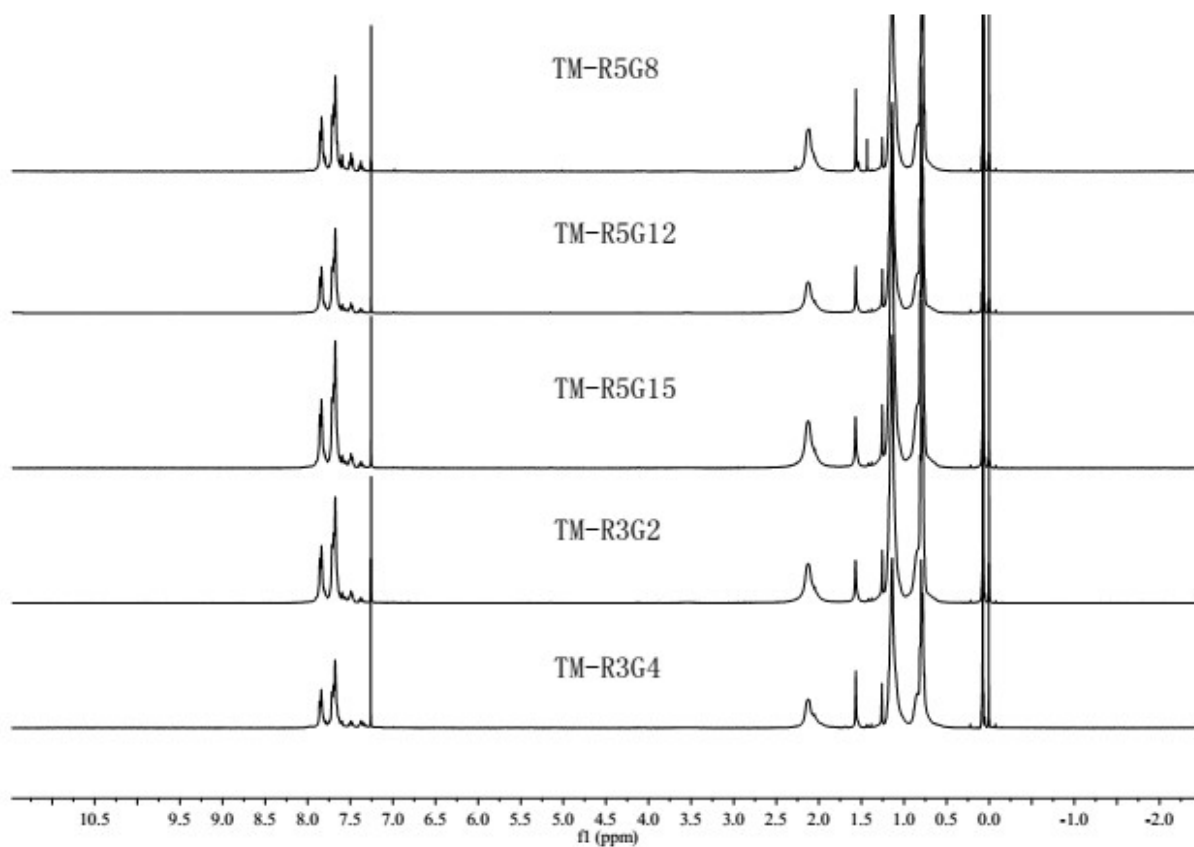

**Figure S14** <sup>1</sup>H NMR spectra of TM-RxGy.
